# Supplementary material
Source: PubMed Central journal article supplement (PMC6683286)
Supplement: NIHMS1529937-supplement-1.pdf [file NIHMS1529937-supplement-1.pdf]

## Supplementary Information

### Targeting HIF-1 $\alpha$ in Combination with PPAR $\alpha$ Activation and Postnatal Factors Promotes the Metabolic Maturation of Human Induced Pluripotent Stem Cell-derived Cardiomyocytes

Cinsley Gentillon<sup>a</sup>, Dong Li<sup>a</sup>, Meixue Duan<sup>b</sup>, Wen-Mei Yu<sup>a</sup>, Marcela K. Preininger<sup>a,c</sup>, Rajneesh Jha<sup>a</sup>, Antonio Rampoldi<sup>a</sup>, Anita Saraf<sup>a</sup>, Gregory C Gibson<sup>b</sup>, Cheng-Kui Qu<sup>a</sup>, Lou Ann Brown<sup>a</sup>, Chunhui Xu<sup>a,c,\*</sup>

<sup>a</sup>Department of Pediatrics, Emory University School of Medicine and Children's Healthcare of Atlanta, Atlanta, GA, USA

<sup>b</sup>School of Biological Sciences, Georgia Institute of Technology, Atlanta, GA, USA

<sup>c</sup>Wallace H. Coulter Department of Biomedical Engineering, Georgia Institute of Technology and Emory University, Atlanta, GA, USA

\*Correspondence: [chunhui.xu@emory.edu](mailto:chunhui.xu@emory.edu)

## Supplemental Methods

### *High-content imaging analysis by Arrayscan*

Following the maturation treatment, cardiac spheres were dissociated using 0.25% trypsin-EDTA and plated onto a Matrigel-coated 96-well culture plate at a density of  $5 \times 10^4$  cells/well for the detection of NKX2-5 and  $2 \times 10^4$  cells/well for the detection of MLC2V and  $\alpha$ -actinin. Cells were maintained in the maturation medium for 24 h to allow cells to recover spontaneous beating. The next day the medium was aspirated and cells were washed with PBS, fixed in 4% paraformaldehyde (Sigma-Aldrich, St. Louis, MO) and permeabilized in ice-cold methanol. The cells were then blocked with 5% normal goat serum (NGS) in PBS at room temperature for 1 h and incubated overnight at 4°C with the primary antibodies NKX2-5 for the purity assay or  $\alpha$ -actinin together with MLC2V for the subtype detection assay. After the incubation with the primary antibodies, the cells were washed twice with PBS and incubated with the corresponding conjugated secondary antibodies followed by two washes with PBS. The nuclei were counterstained with Hoechst in warm buffer and imaged using an ArrayScan™ XTI Live High Content Platform (Thermo Fisher Scientific).

Images of immunocytochemistry were acquired and quantitatively analyzed using ArrayScan™ XTI Live High Content Platform. Twenty fields/well were imaged using a 10x objective. The Acquisition software Cellomics Scan (Thermo Fisher Scientific) was used to capture images and data analysis was performed using Cellomics View Software (Thermo Fisher Scientific). For the NKX2-5 assay, images were analyzed with a mask modifier for Hoechst and NKX2-5-positive cells restricted to the nucleus. The percentage of NKX2-5-positive cells and average of NKX2-5 intensity per well in each treatment were used as readout. In the MLC2V detection assay, images were analyzed with a mask modifier for Hoechst restricted to the nucleus. MLC2V and  $\alpha$ -actinin were each quantified with a spot mask that extended 7 units from the nucleus. Spot threshold was set to 10 units and detection limit was set at 25 units. The percentage of MLC2V- and  $\alpha$ -actinin-positive cells and average intensity per well were used as readout.

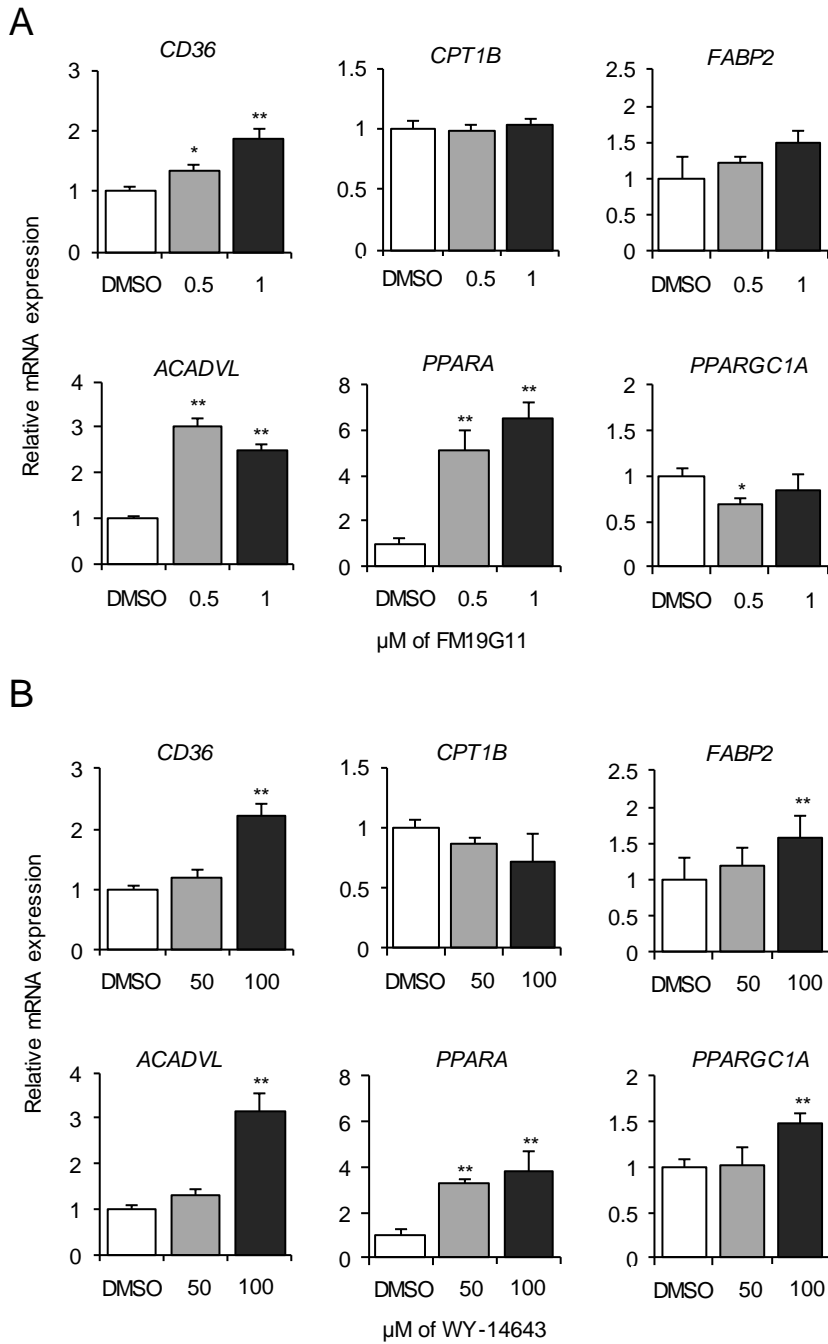

**Supplementary Figure 1.** Relative gene expression levels of FAO-related genes in hiPSC-CMs treated with (A) 0, 0.5 or 1  $\mu$ M FM19G11 and (B) 0, 50 or 100  $\mu$ M WY-14643

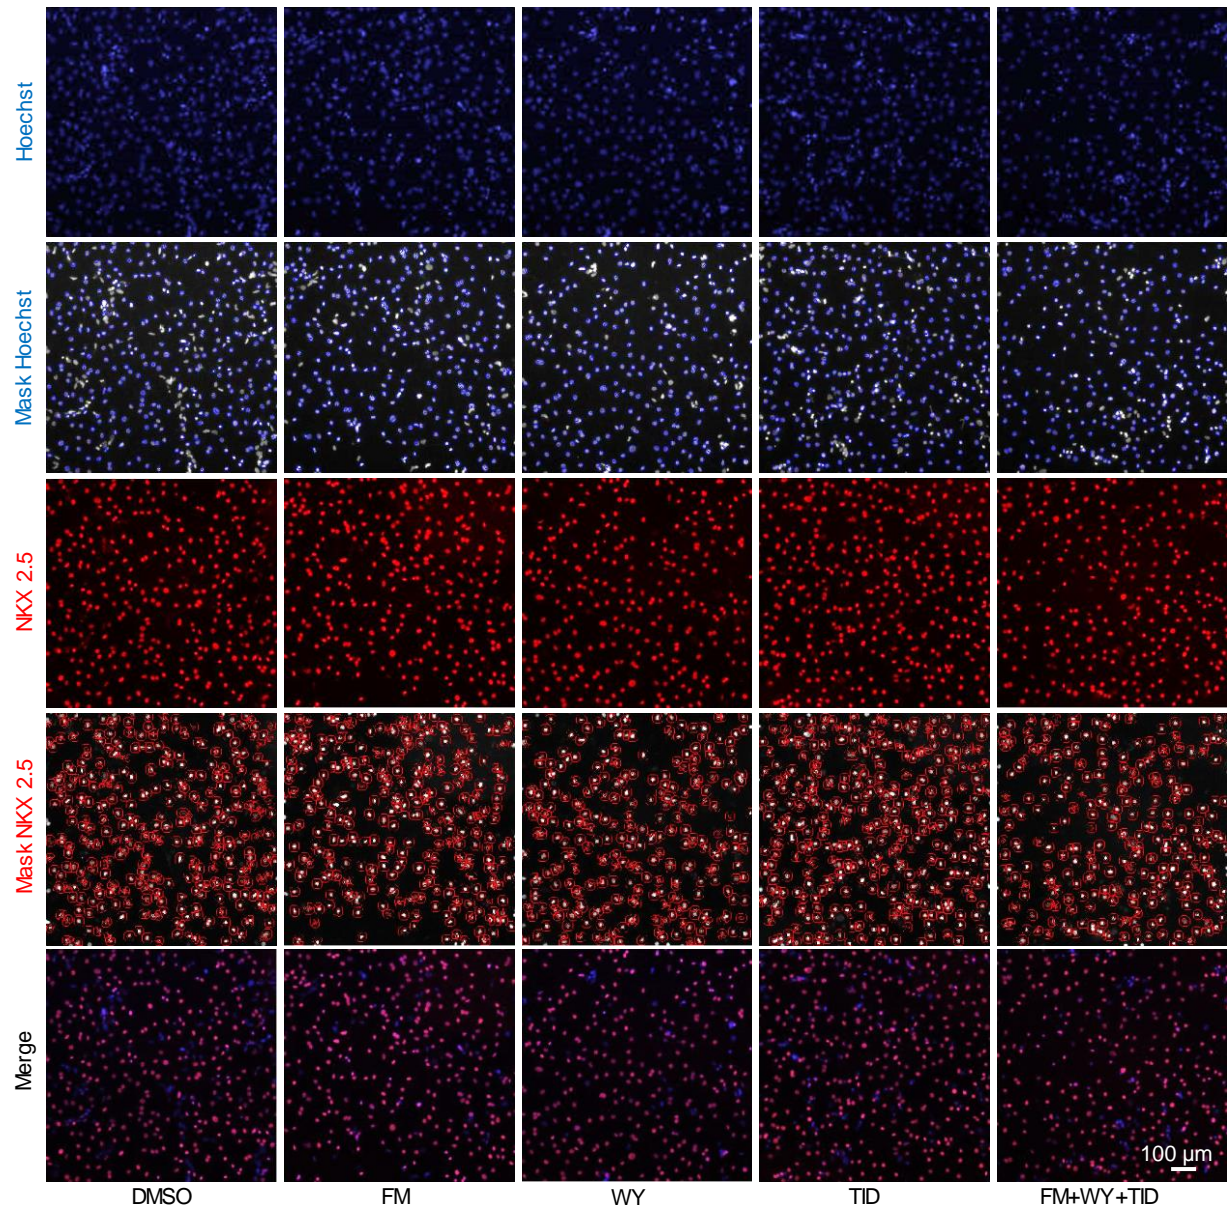

**Supplementary Figure 2.** Representative images for quantitative analysis of NKX2-5 by high-content imaging using ArrayScan (Related to Fig. 1C). Images were analyzed with a mask modifier for Hoechst and NKX2-5-positive cells restricted to the nucleus. FM, FM19G11; WY, WY-14643; TID, T3 + IGF-1 + dexamethasone.

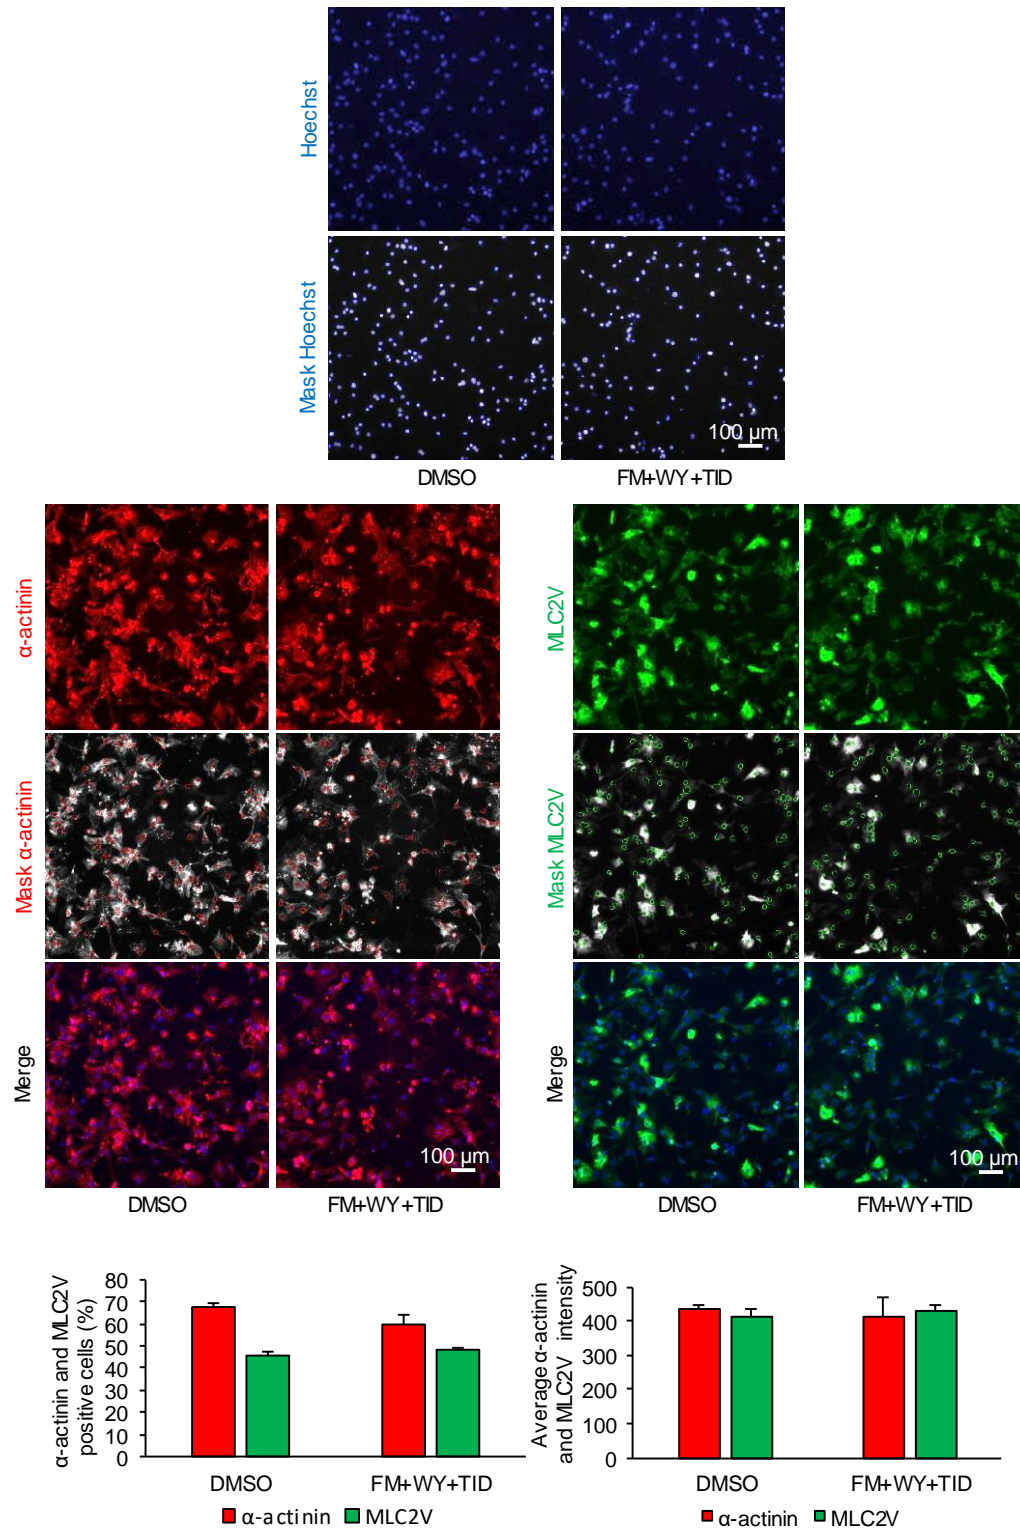

**Supplementary Figure 3.** Immunocytochemical analysis of MLC2V and  $\alpha$ -actinin. Representative images and quantitative analysis of MLC2V and  $\alpha$ -actinin by high-content imaging using ArrayScan. Images were analyzed with a mask modifier for Hoechst restricted to the nucleus. MLC2V and  $\alpha$ -actinin were each quantified with a spot mask that extended 7 units from the nucleus. FM, FM19G11; WY, WY-14643; TID, T3 + IGF-1 + dexamethasone.

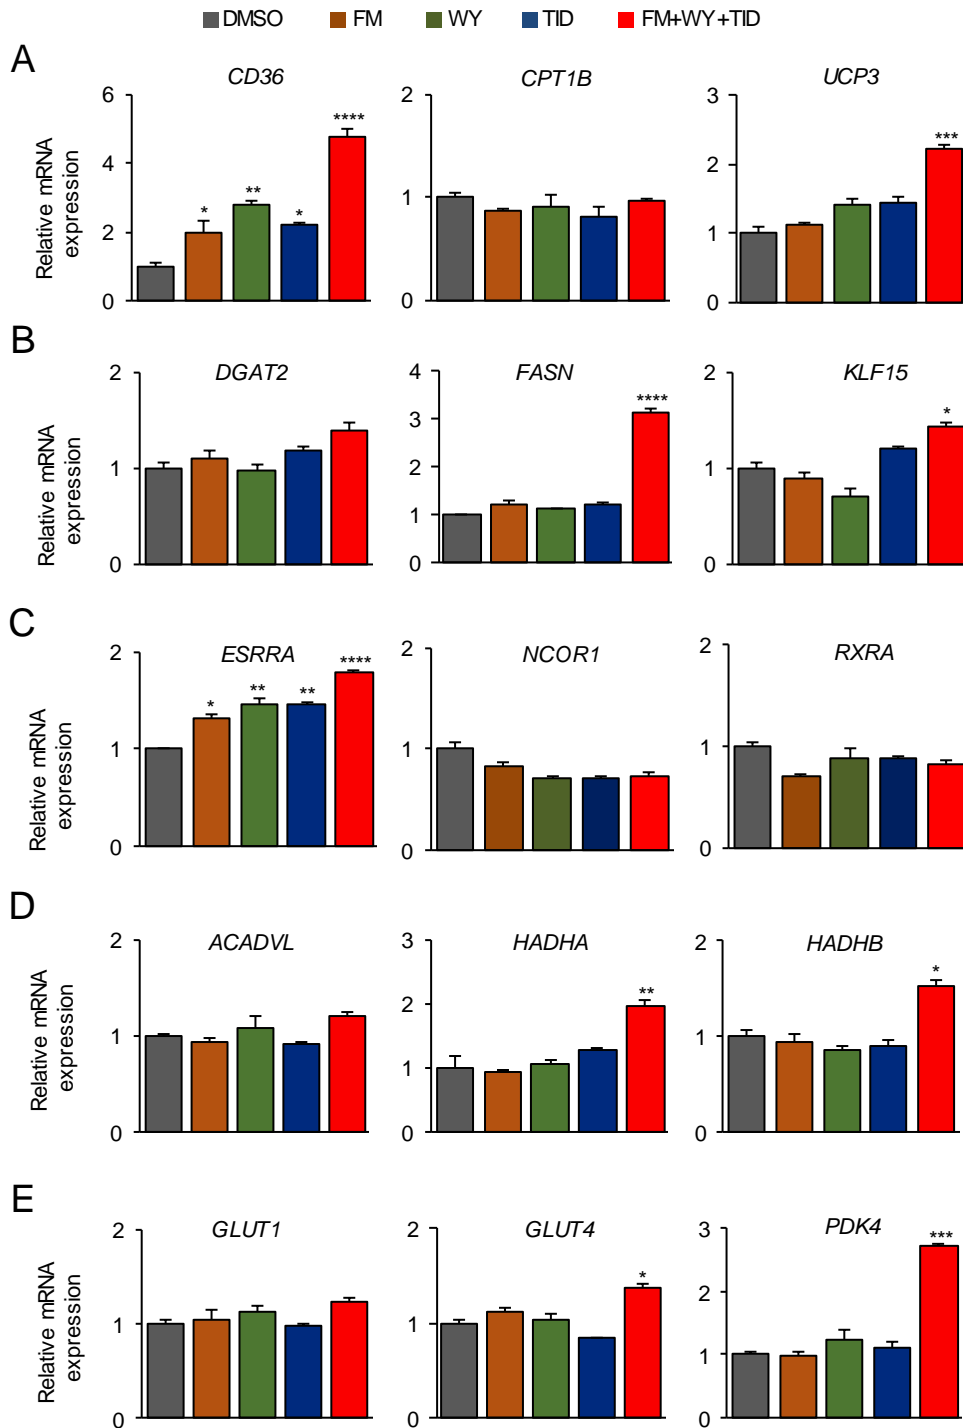

**Supplementary Figure 4.** Treatments of 3D cardiac spheres with a HIF-1 $\alpha$  inhibitor, a PPAR $\alpha$  activator and the postnatal factors (T3, IGF-1 and dexamethasone) increase the mRNA expression of metabolic genes. qRT-PCR quantification of the relative expression of genes implicated in (A) fatty acid transport, (B) lipid storage, (C) mitochondrial fatty acid oxidation, (D) transcriptional regulation, and (E) intracellular glucose uptake. Data are presented as mean  $\pm$  SEM (n=3). \*P<0.05, \*\*P<0.01, \*\*\*P<0.001, \*\*\*\*P<0.0001; by one-way ANOVA. FM, FM19G11; WY, WY-14643; TID, T3 + IGF-1 + dexamethasone.

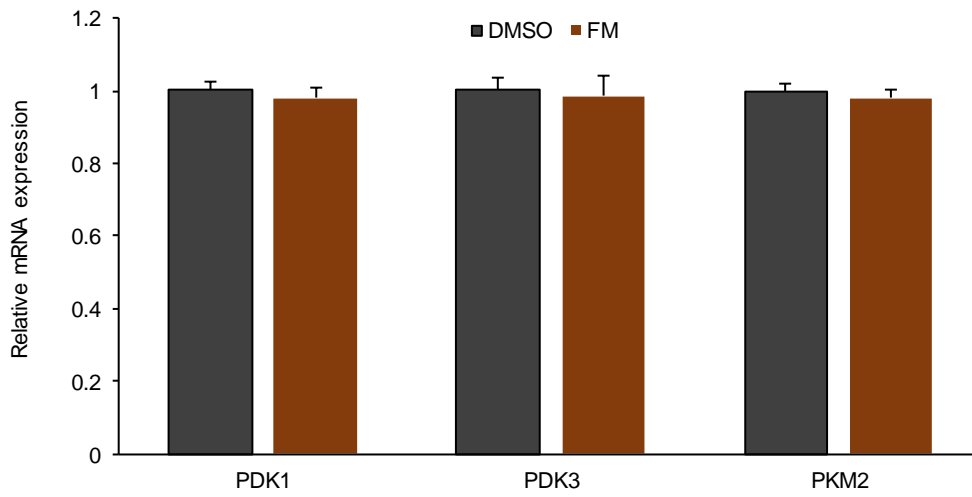

**Supplementary Figure 5.** qRT-PCR analysis of glucose metabolism-related genes. Data are presented as mean  $\pm$  SEM (n=3). FM, FM19G11.

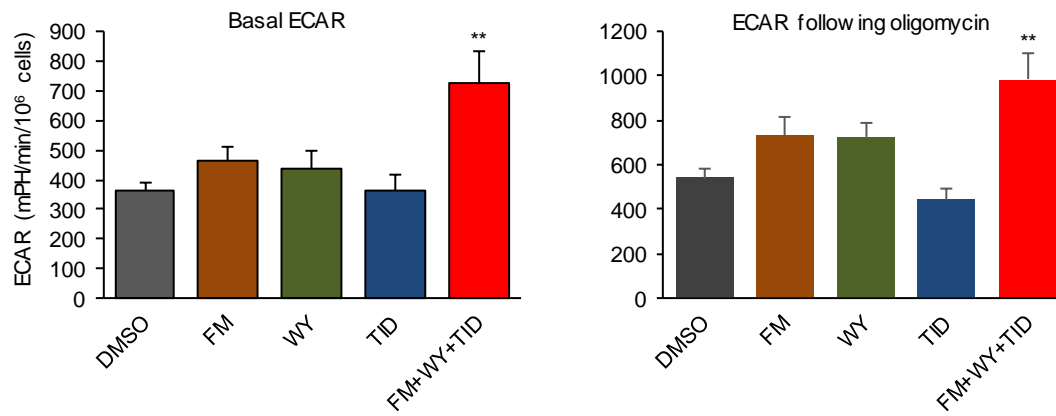

**Supplementary Figure 6.** ECAR of hiPSC-CMs treated with DMSO, FM, WY, TID or FM+WY+TID. ECAR of hiPSC-CMs at basal level and after the addition of oligomycin are presented as mean  $\pm$  SEM (n=4). FM, FM19G11; WY, WY-14643; TID, T3 + IGF-1 + dexamethasone. Note that ECAR was from the measurement of mitochondrial function using Mito Stress test.



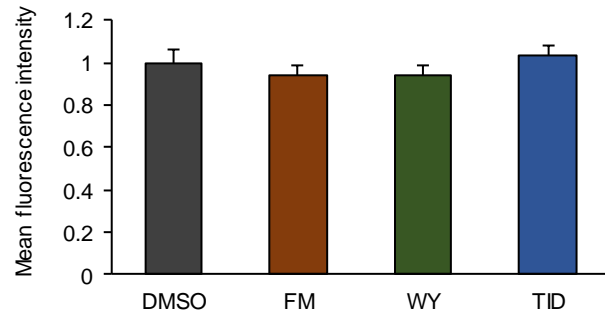

**Supplementary Figure 7.** Mitochondrial content of hiPSC-CMs. Cardiac spheres were treated with DMSO, FM, WY or TID for 7 days and analyzed for mitochondrial content by flow cytometry. Relative MitoTracker Red fluorescence data are presented as mean  $\pm$  SEM (n=5). FM, FM19G11; WY, WY-14643; TID, T3 + IGF-1 + dexamethasone.

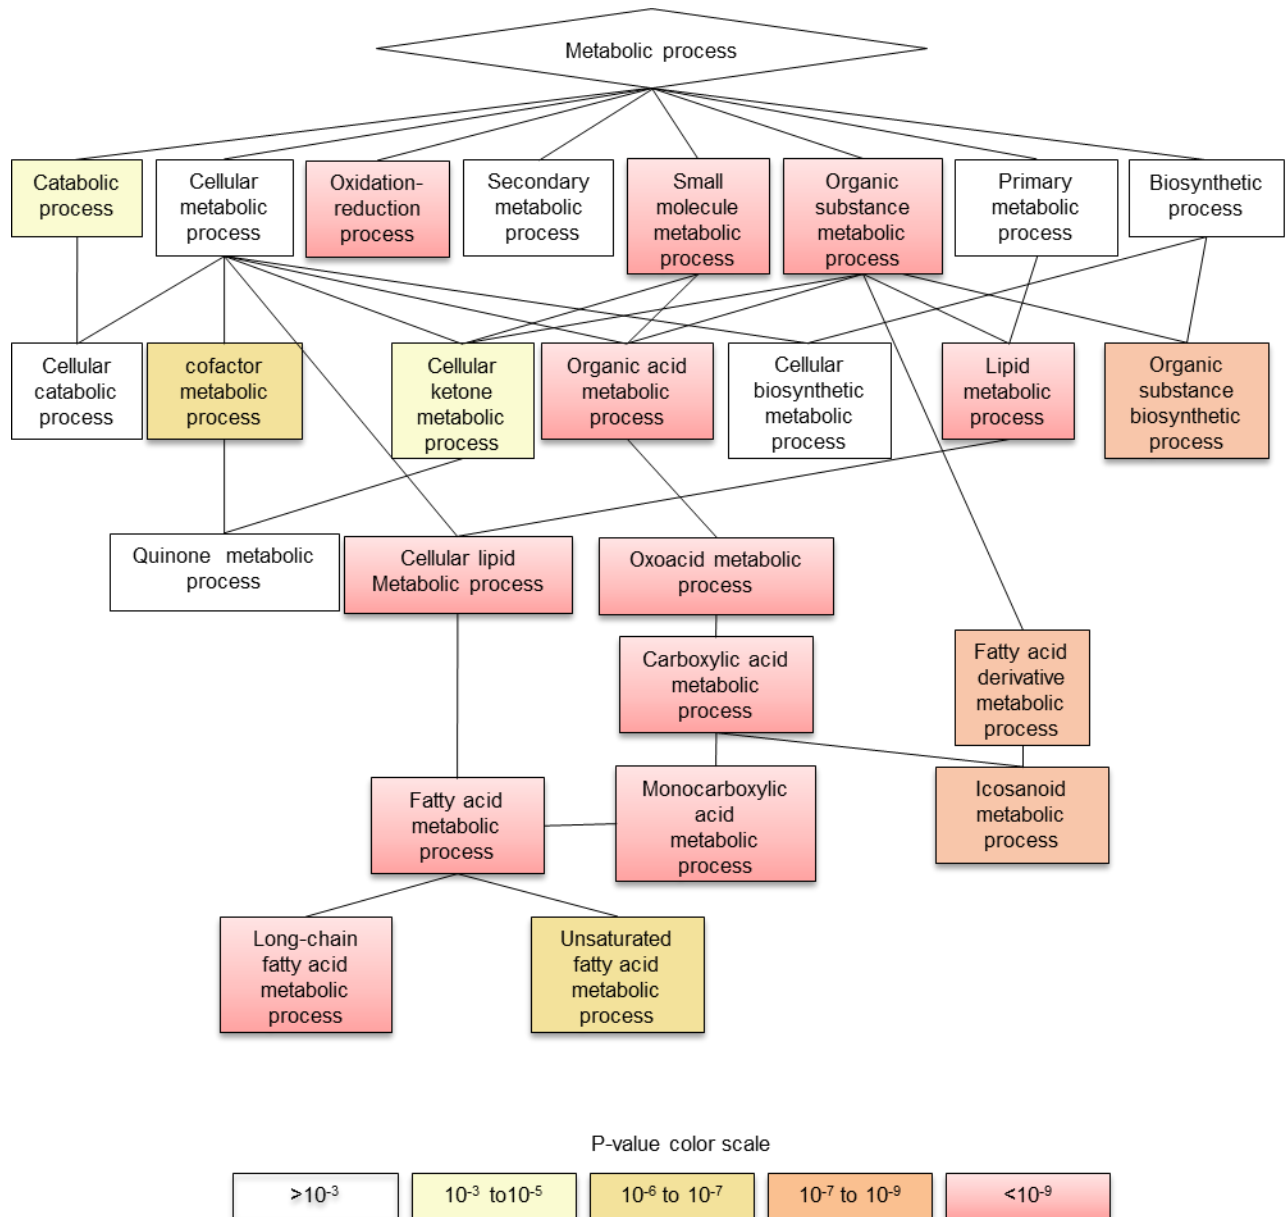

**Supplementary Figure 8.** Polyhierarchical graph shows GO terms under the metabolic process ontology. AmiGO visualization was used to determine directionality of hierarchy as shown by the arrows and colors represent p-values of GO terms that are significantly different.

**Supplementary Table 1. Antibodies**

| Type      | Antibody target                  | Origin type | Supplier       | Catalog number | Dilution |
|-----------|----------------------------------|-------------|----------------|----------------|----------|
| Primary   | $\alpha$ -actinin                | Mouse IgG1  | Sigma          | A7811          | 1:500    |
|           | NKX2-5                           | Rabbit IgG  | Cell Signaling | 8792S          | 1:1600   |
|           | Troponin I                       | Mouse IgG2b | Millipore      | MAB4360        | 1:200    |
|           | Troponin T                       | Mouse IgG1  | Thermo Fisher  | MS-295-P1      | 1:200    |
|           | MLC2V                            | Rabbit IgG  | Abcam          | ab79935        | 1:200    |
| Secondary | Alexa 488, goat anti-mouse IgG1  |             | Thermo Fisher  | A21121         | 1:1000   |
|           | Alexa 594, goat anti-mouse IgG2b |             | Thermo Fisher  | A21145         | 1:1000   |
|           | Alexa 594, goat anti-rabbit      |             | Thermo Fisher  | A11012         | 1:1000   |
|           | Alexa 594, donkey anti-mouse IgG |             | Thermo Fisher  | A21203         | 1:500    |

**Supplementary Table 2. qRT-PCR Primers**

| <b>Gene</b>    | <b>Full name</b>                                                    | <b>Accession Code</b> | <b>Primer</b>                                     |
|----------------|---------------------------------------------------------------------|-----------------------|---------------------------------------------------|
| <i>ACADVL</i>  | Acyl-CoA dehydrogenase, very long chain                             | NM_000018             | ACAGATCAGGTGTTCCCATACC<br>CTTGCGGGATCGTTCACTT     |
| <i>ACSL5</i>   | Acyl-CoA synthetase long-chain family member 5                      | NM_203379             | CTCAACCCGTCTTACCTCTTCT<br>GCAGCAACTTGTTAGGTCATTG  |
| <i>ADRB1</i>   | Adrenergic, beta-1-, receptor                                       | NM_000684             | ATCGAGACCCTGTGTGTCATT<br>GTAGAAGGAGACTACGGACGAG   |
| <i>ALDH1A1</i> | Aldehyde dehydrogenase 1 family, member A1                          | NM_000689             | CCGTGGCGTACTATGGATGC<br>GCAGCAGACGATCTCTTTCGAT    |
| <i>COQ10A</i>  | Coenzyme Q10 homolog A                                              | NM_144576             | CTTACCTTCGAGCCGTTTCTT<br>CCATGATTCTACGCTCCGAGTA   |
| <i>CPT1A</i>   | Carnitine palmitoyltransferase 1A                                   | NM_001876             | ATGCGCTACTCCCTGAAAGTG<br>GTGGCAGACTCATCTTGC       |
| <i>CPT1B</i>   | Carnitine palmitoyltransferase 1B                                   | NM_004377             | GCGCCCCTTGTTGGATGAT<br>CCACCATGACTTGAGCACCAG      |
| <i>CD36</i>    | Collagen type I receptor, thrombospondin receptor                   | NM_000072             | GGCTGTGACCGGAACTGTG<br>AGGTCTCCAACCTGGCATTAGAA    |
| <i>DGAT2</i>   | Diacylglycerol O-acyltransferase 2                                  | NM_198512             | CCTGTAGCTGCTTTTCCACC<br>GAGGGGTCTGGGAGATGG        |
| <i>ESRRA</i>   | Estrogen related receptor alpha                                     | NM_004451             | CGCTTGGTGATCTCACACTC<br>GCTACCACTATGGTGTGGCA      |
| <i>FABP4</i>   | Fatty acid binding protein 4                                        | NM_001442             | ACTGGGCCAGGAATTTGACG<br>CTCGTGGAAGTGACGCCTT       |
| <i>FKBP5</i>   | FK506 binding protein 5                                             | NM_004117             | CTCCCTAAAATTCCCTCGAATGC<br>CCCTCTCCTTTCCGTTTGGTT  |
| <i>FASN</i>    | Fatty acid synthase                                                 | NM_004104             | TCTCCGACTCTGGCAGCTT<br>GCTCCAGCCTCGCTCTC          |
| <i>GAPDH</i>   | Glyceraldehyde-3-phosphate dehydrogenase                            | NM_001256799          | CTGGGCTACACTGAGCACC<br>AAGTGGTCGTTGAGGGCAATG      |
| <i>GLUT1</i>   | Solute carrier family 2 (Facilitated glucose transporter), member 1 | NM_006516             | ACTCCTCGATCACCTTCTGG<br>ATGGAGCCCAGCAGCAA         |
| <i>GLUT4</i>   | Solute carrier family 2 (Facilitated glucose transporter), member 4 | NM_001042             | AGCACCGCAGAGAACACAG<br>GTCGGGCTTCCAACAGATAG       |
| <i>GPAM</i>    | Glycerol-3-phosphate acyltransferase, mitochondrial                 | NM_001244949          | GATGTAAGCACACAAGTGAGGA<br>TCCGACTCATTAGGCTTTCTTTC |
| <i>HADHA</i>   | Hydroxyacyl-CoA dehydrogenase/3-ketoacyl-CoA                        | NM_000182             | CCGTTCTCTGGAGGTTTTA<br>TGGTAGAAGCATTCTGTGCAG      |

|                 |                                                                                                                 |           |                                                       |
|-----------------|-----------------------------------------------------------------------------------------------------------------|-----------|-------------------------------------------------------|
|                 | thiolase/enoyl-CoA hydratase (Trifunctional protein), alpha subunit                                             |           |                                                       |
| <i>HADHB</i>    | Hydroxyacyl-CoA dehydrogenase/3-ketoacyl-CoA thiolase/enoyl-CoA hydratase (Trifunctional protein), beta subunit | NM_000183 | GAAAATCTGAGGGCCCATT<br>CTTGCTCCGAGAGGGAGTC            |
| <i>KLF15</i>    | Kruppel like factor 15                                                                                          | NM_014079 | TCAGAGCGCGAGAACCTC<br>TGACACCAAAGCAGCCAC              |
| <i>MAOA</i>     | Monoamine oxidase A                                                                                             | NM_000240 | GAATCAAGAGAAGGCGAGTATC<br>G<br>GGCAGCAGATAGTCCTGAAATG |
| <i>MPC2</i>     | Mitochondrial pyruvate carrier 2                                                                                | NM_016098 | TTATCAGTGGGCGGATGACAT<br>GCTGTACCTTGTAGGCAAATCTC      |
| <i>NCOR1</i>    | Nuclear receptor corepressor 1                                                                                  | NM_006311 | CCAGACTGTGAGATCAATGCC<br>CGTCCCACTCCTCAGGC            |
| <i>PCK1</i>     | Phosphoenolpyruvate carboxykinase 1                                                                             | NM_002591 | TTGAGAAAGCGTTCAATGCCA<br>CACGTAGGGTGAATCCGTCAG        |
| <i>PDK4</i>     | Pyruvate dehydrogenase kinase 4                                                                                 | NM_002612 | TGTGAATTGGTTGGTCTGGA<br>TGTGGTAGCAGTGGTCCAAG          |
| <i>PGC1A</i>    | Peroxisome proliferator-activated receptor gamma coactivator 1 alpha                                            | NM_013261 | GACCAGATGGTGCTGGTTG<br>TGAGTGGAGTGATGGAGCAG           |
| <i>PPARA</i>    | Peroxisome proliferator activated receptor alpha                                                                | NM_005036 | CTGCTAGCAAGTTTGCCTCA<br>AGTGGTGCAGTGACCAATCA          |
| <i>PPARGC1A</i> | Peroxisome proliferator-activated receptor gamma, coactivator 1 alpha                                           | NM_013261 | GACCAGATGGTGCTGGTTG<br>TGAGTGGAGTGATGGAGCAG           |
| <i>RXRA</i>     | Retinoid X receptor, alpha                                                                                      | NM_002957 | TGTCAATCAGGCAGTCCTTG<br>GAGTGTACAGCTGCGAGGG           |
| <i>UCP3</i>     | Uncoupling protein 3                                                                                            | NM_003356 | AACGCAAAAAGGAGGGTGTA<br>CTCCAGGCCAGTACTTCAGC          |
| <i>PDK1</i>     | Pyruvate dehydrogenase kinase 1                                                                                 | NM_002610 | ACTTCGGATCAGTGAATGCTTG<br>ACTCTTGCCGCAGAAACATAAA      |
| <i>PDK3</i>     | Pyruvate dehydrogenase kinase 3                                                                                 | NM_005391 | CGCTCTCCATCAAACAATTCCT<br>CCTACTGAAGGGCGGTTAAGTA      |
| <i>PKM2</i>     | Pyruvate kinase M1/2                                                                                            | NM_002654 | AAGGACCTGAGATCCGAACTG<br>GCGTTATCCAGCGTGATTTTGA       |

**Supplementary Table 3.** Expression of ion channels, solute carriers, calcium transients and contractile/structure-related genes in hiPSC-CMs upon treatment with FM+WY+TID compared with DMSO-treated cells

| Symbol          | Gene name                                                                 | Log <sub>2</sub> fold change | Adjusted p-value |
|-----------------|---------------------------------------------------------------------------|------------------------------|------------------|
| <i>KCNE3</i>    | Potassium voltage-gated channel subfamily E, regulatory subunit 3         | 0.799                        | 4.48E-02         |
| <i>KCNIP1</i>   | Potassium voltage-gated channel interacting protein 1                     | 0.864                        | 3.95E-03         |
| <i>KCNJ16</i>   | Potassium voltage-gated channel subfamily J, member 16                    | 1.014                        | 4.09E-05         |
| <i>KCNK5</i>    | Potassium two pore domain channel subfamily K, member 5                   | 1.202                        | 1.77E-04         |
| <i>SCNN1A</i>   | Sodium channel epithelial 1, alpha subunit                                | 4.887                        | 9.70E-114        |
| <i>SCNN1G</i>   | Sodium channel epithelial 1, gamma subunit                                | 1.064                        | 2.37E-04         |
| <i>SLC25A10</i> | Solute carrier family 25, member 10                                       | 0.595                        | 2.34E-02         |
| <i>SLC25A5</i>  | Solute carrier family 25, member 5                                        | 0.54                         | 3.05E-02         |
| <i>SCN5A</i>    | sodium voltage-gated channel alpha subunit 5                              | -0.025                       | 9.76E-01         |
| <i>ATP1A1</i>   | ATPase Na <sup>+</sup> /K <sup>+</sup> transporting subunit alpha 1       | 0.882                        | 1.46E-04         |
| <i>ATP1B1</i>   | ATPase Na <sup>+</sup> /K <sup>+</sup> transporting subunit beta 1        | 0.273                        | 5.34E-01         |
| <i>ATP2A2</i>   | ATPase sarcoplasmic/endoplasmic reticulum Ca <sup>2+</sup> transporting 2 | 0.523                        | 1.20E-01         |
| <i>CACNA1C</i>  | calcium voltage-gated channel subunit alpha1 C                            | -0.336                       | 4.12E-06         |
| <i>CACNA1D</i>  | calcium voltage-gated channel subunit alpha1 D                            | 0.389                        | 1.72E-01         |
| <i>CALM1</i>    | calmodulin 1                                                              | -0.142                       | 7.59E-01         |
| <i>FKBP12.6</i> | FKBP prolyl isomerase 1B                                                  | 0.118                        | 8.18E-01         |
| <i>PLN</i>      | phospholamban                                                             | -0.455                       | 3.51E-01         |
| <i>RYR2</i>     | ryanodine receptor 2                                                      | -0.086                       | 9.23E-01         |
| <i>SLC8A1</i>   | solute carrier family 8 member A1                                         | -0.091                       | 9.16E-01         |
| <i>ACTC1</i>    | actin, alpha, cardiac muscle 1                                            | -0.415                       | 3.60E-01         |
| <i>CDH2</i>     | cadherin 2                                                                | -0.183                       | 7.31E-01         |
| <i>DES</i>      | desmin                                                                    | -0.689                       | 1.06E-01         |
| <i>GJA1</i>     | gap junction protein alpha 1                                              | -0.848                       | 5.19E-02         |
| <i>HCN4</i>     | hyperpolarization activated cyclic nucleotide gated potassium channel 4   | -0.034                       | 9.61E-01         |
| <i>JPH2</i>     | junctional protein 2                                                      | -0.18                        | 6.68E-01         |
| <i>MYBPC3</i>   | myosin binding protein C, cardiac                                         | -0.224                       | 6.70E-01         |
| <i>MYH6</i>     | myosin heavy chain 6                                                      | 0.577                        | 9.65E-02         |
| <i>MYH7</i>     | myosin heavy chain 7                                                      | -4.34                        | 3.19E-42         |
| <i>TNNC1</i>    | troponin C1, slow skeletal and cardiac type                               | -0.549                       | 1.91E-01         |
| <i>TNNT2</i>    | troponin T2, cardiac type                                                 | -0.207                       | 7.34E-01         |
| <i>TTN</i>      | titin                                                                     | -0.31                        | 5.58E-01         |

**Supplementary Table 4.** Shared upregulated genes between FM+WY+TID-treated hiPSC-CMs and LV compared to DMSO-treated hiPSC-CMs.

| Symbol          | Gene name                                               | Log <sub>2</sub> ratio FM+WY+TID-treated hiPSC-CMs vs. DMSO-treated hiPSC-CMs | Log <sub>2</sub> ratio LV vs. DMSO-treated hiPSC-CMs |
|-----------------|---------------------------------------------------------|-------------------------------------------------------------------------------|------------------------------------------------------|
| <i>ABCG2</i>    | ATP binding cassette subfamily G member 2               | 4.669                                                                         | 2.693                                                |
| <i>ACSL5</i>    | Acyl-CoA synthetase long chain family member 5          | 2.608                                                                         | 2.18                                                 |
| <i>ADCK3</i>    | Aarf domain containing kinase 3                         | 0.871                                                                         | 4.391                                                |
| <i>ADRB1</i>    | Adrenoceptor beta 1                                     | 1.119                                                                         | 4.224                                                |
| <i>AIFM2</i>    | Apoptosis inducing factor, mitochondria associated 2    | 1.096                                                                         | 1.778                                                |
| <i>AKR1C2</i>   | Aldo-keto reductase family 1 member C2                  | 5.816                                                                         | 2.885                                                |
| <i>ALDH1L1</i>  | Aldehyde dehydrogenase 1 family member L1               | 1.679                                                                         | 6.404                                                |
| <i>ART3</i>     | ADP-ribosyltransferase 3                                | 1.337                                                                         | 4.572                                                |
| <i>C15orf59</i> | Chromosome 15 open reading frame 59                     | 1.177                                                                         | 3.595                                                |
| <i>C1orf115</i> | Chromosome 1 open reading frame 115                     | 1.119                                                                         | 2.516                                                |
| <i>CA4</i>      | Carbonic anhydrase 4                                    | 3.547                                                                         | 7.937                                                |
| <i>CADM2</i>    | Cell adhesion molecule 2                                | 2.651                                                                         | 3.357                                                |
| <i>COQ10A</i>   | Coenzyme Q10A                                           | 1.09                                                                          | 4.1                                                  |
| <i>CRYM</i>     | Crystallin mu                                           | 1.548                                                                         | 8.523                                                |
| <i>CTSD</i>     | Cathepsin D                                             | 0.851                                                                         | 2.782                                                |
| <i>DUSP13</i>   | Dual specificity phosphatase 13                         | 1.791                                                                         | 3.653                                                |
| <i>EPAS1</i>    | Endothelial PAS domain protein 1                        | 1.259                                                                         | 3.737                                                |
| <i>EPB41L4B</i> | Erythrocyte membrane protein band 4.1 like 4B           | 1.09                                                                          | 2.732                                                |
| <i>ETNPPL</i>   | Ethanolamine-phosphate phospho-lyase                    | 1.722                                                                         | 3.645                                                |
| <i>FABP4</i>    | Fatty acid binding protein 4                            | 3.459                                                                         | 12.978                                               |
| <i>FAM155B</i>  | Family with sequence similarity 155 member B            | 1.21                                                                          | 4.562                                                |
| <i>FAM20A</i>   | FAM20A, golgi associated secretory pathway pseudokinase | 1.196                                                                         | 2.115                                                |
| <i>FKBP5</i>    | FK506 binding protein 5                                 | 1.348                                                                         | 2.262                                                |
| <i>GALT</i>     | Galactose-1-phosphate uridylyltransferase               | 0.77                                                                          | 1.753                                                |
| <i>GIPC2</i>    | GIPC PDZ domain containing family member 2              | 1.636                                                                         | 2.623                                                |
| <i>GPAT3</i>    | Glycerol-3-phosphate acyltransferase 3                  | 1.276                                                                         | 2.875                                                |
| <i>GPNMB</i>    | Glycoprotein nmb                                        | 1.391                                                                         | 7.626                                                |
| <i>GPX3</i>     | Glutathione peroxidase 3                                | 1.661                                                                         | 5.108                                                |
| <i>GRB14</i>    | Growth factor receptor bound protein 14                 | 1.806                                                                         | 3.153                                                |
| <i>HLF</i>      | HLF, PAR bZIP transcription factor                      | 1.616                                                                         | 6.399                                                |
| <i>IL15RA</i>   | Interleukin 15 receptor subunit alpha                   | 1.467                                                                         | 2.762                                                |

|                   |                                                                                        |       |       |
|-------------------|----------------------------------------------------------------------------------------|-------|-------|
| <i>IMPA2</i>      | Inositol monophosphatase 2                                                             | 1.267 | 1.858 |
| <i>IP6K3</i>      | Inositol hexakisphosphate kinase 3                                                     | 2.152 | 7.356 |
| <i>KLF15</i>      | Kruppel like factor 15                                                                 | 1.329 | 5.537 |
| <i>KLF9</i>       | Kruppel like factor 9                                                                  | 1.591 | 2.935 |
| <i>LOC730102</i>  | Quinone oxidoreductase-like protein 2                                                  | 1.256 | 4.471 |
| <i>MAOA</i>       | Monoamine oxidase A                                                                    | 2.246 | 5.302 |
| <i>METTL7A</i>    | Methyltransferase like 7A                                                              | 1.201 | 1.991 |
| <i>MFSD7</i>      | Major facilitator superfamily domain containing 7                                      | 1.279 | 3.524 |
| <i>MGAT4A</i>     | Mannosyl (alpha-1,3-)-glycoprotein beta-1,4-N-acetylglucosaminyltransferase, isozyme A | 1.226 | 1.599 |
| <i>MGLL</i>       | Monoglyceride lipase                                                                   | 1.613 | 4.903 |
| <i>MPC2</i>       | Mitochondrial pyruvate carrier 2                                                       | 0.705 | 1.999 |
| <i>MRO</i>        | Maestro                                                                                | 3.161 | 5.45  |
| <i>MX1</i>        | MX dynamin like GTPase 1                                                               | 1.283 | 4.159 |
| <i>NEAT1</i>      | Nuclear paraspeckle assembly transcript 1 (non-protein coding)                         | 1.514 | 2.826 |
| <i>NPR1</i>       | Natriuretic peptide receptor 1                                                         | 1.186 | 2.768 |
| <i>NR3C2</i>      | Nuclear receptor subfamily 3 group C member 2                                          | 1.835 | 4.822 |
| <i>OAS1</i>       | 2'-5'-oligoadenylate synthetase 1                                                      | 1.694 | 2.266 |
| <i>PDK4</i>       | Pyruvate dehydrogenase kinase 4                                                        | 2.033 | 8.539 |
| <i>PHYH</i>       | Phytanoyl-CoA 2-hydroxylase                                                            | 0.801 | 3.557 |
| <i>PLA2G16</i>    | Phospholipase A2 group XVI                                                             | 1.282 | 3.624 |
| <i>PLA2G5</i>     | Phospholipase A2 group V                                                               | 1.622 | 5.455 |
| <i>PSMB9</i>      | Proteasome subunit beta 9                                                              | 1.447 | 3.116 |
| <i>PTGER4</i>     | Prostaglandin E receptor 4                                                             | 1.937 | 2.583 |
| <i>RASSF4</i>     | Ras association domain family member 4                                                 | 0.91  | 2.012 |
| <i>RGN</i>        | Regucalcin                                                                             | 1.187 | 3.339 |
| <i>RIPK3</i>      | Receptor interacting serine/threonine kinase 3                                         | 1.324 | 2.152 |
| <i>S100A9</i>     | S100 calcium binding protein A9                                                        | 3.095 | 6.292 |
| <i>SERPINB9P1</i> | Serpin family B member 9 pseudogene 1                                                  | 1.891 | 3.878 |
| <i>SLC2A12</i>    | Solute carrier family 2 member 12                                                      | 0.806 | 1.553 |
| <i>SLC2A4</i>     | Solute carrier family 2 member 4                                                       | 0.763 | 5.144 |
| <i>SQRDL</i>      | Sulfide quinone oxidoreductase                                                         | 0.917 | 2.036 |
| <i>SULT1A1</i>    | Sulfotransferase family 1A member 1                                                    | 1.131 | 2.03  |
| <i>THRB</i>       | Thyroid hormone receptor beta                                                          | 1.281 | 1.574 |
| <i>TINAGL1</i>    | Tubulointerstitial nephritis antigen like 1                                            | 0.953 | 4.007 |
| <i>TM7SF2</i>     | Transmembrane 7 superfamily member 2                                                   | 0.887 | 2.667 |
| <i>TMEM139</i>    | Transmembrane protein 139                                                              | 1.223 | 2.551 |
| <i>TNFSF10</i>    | TNF superfamily member 10                                                              | 1.427 | 2.603 |
| <i>VWC2</i>       | Von Willebrand factor C domain containing 2                                            | 1.708 | 3.871 |
| <i>WDR62</i>      | WD repeat domain 62                                                                    | 0.768 | 1.38  |
| <i>ZBTB16</i>     | Zinc finger and BTB domain containing 16                                               | 1.934 | 3.952 |
| <i>ZNF563</i>     | Zinc finger protein 563                                                                | 1.424 | 1.959 |
